# Supplementary material for: Die Rolle elterlicher Kommunikation in Konfliktsituationen für das Erziehungsverhalten und das psychische Wohlbefinden von Jugendlichen
Source: Atypon-hosted journal article supplement (doi:10.1026/0942-5403/a000378), 2022-09-05
Supplement: 0942-5403_a000378_esm1.pdf [file 0942-5403_a000378_esm1.pdf]

## ESM 1. Statische Analyse

Die statistische Auswertung der Strukturgleichungsmodelle erfolgt mit dem Programm Mplus Version 1.3.1. Strukturgleichungsmodelle bieten die Möglichkeit Zusammenhänge zwischen latenten Variablen unter Berücksichtigung von Messfehlern zu untersuchen und sind somit in dieser Hinsicht einfachen Regressionsmodellen überlegen.

Für die *Beurteilung der Modellgüte* werden die Fit-Indizes Root Mean Square of Error Approximation (RMSEA), der Comparative Fit Index (CFI) sowie der Tucker Lewis Index (TLI) berichtet. Ein guter Modell-Fit kann bei  $CFI \geq 0.90$ ,  $TLI \geq 0.90$ ,  $RMSEA < 0.08$  angenommen werden (Weiber & Mülhhaus, 2014). RMSEA Werte im Bereich 0.08 bis 0.10 sprechen für einen mittelmäßigen Fit, Werte  $> 0.10$  für eine schlechte Modellpassung (Hooper, Coughlan & Mullen, 2008).

Da die *Voraussetzung* multivariater normalverteilter Daten zur Berechnung von Strukturgleichungsmodellen für die vorliegende Studie nicht gegeben ist, sowie einzelne fehlende Werte vorhanden sind, wurde als Schätzverfahren Maximum-Likelihood (ML) mit Bootstrapping gewählt. Anhand von Bootstrapping können nicht-symmetrische Konfidenzintervalle berechnet werden, die für nicht normalverteilte und kleine Stichproben wichtige Schätzungen liefern (Muthén, 2015a). Im Vergleich zur Maximum-Likelihood Schätzung mit robusten Standardfehlern (MLR) sei Bootstrapping akkurater, jedoch evtl. konservativer (Muthén, 2015b).

*Fehlende Werte* werden in Mplus durch die Full Information Maximum Likelihood (FIML) Methode geschätzt.

### Literatur

Hooper, D., Coughlan, J., & Mullen, M.R. (2008). Structural equation modelling: guidelines for determining model fit. *The Electronic Journal of Business Research Methods*, 6(1), 53 – 60.

Muthén, B. O. (2015a, 13.01). Bootstrap or MLR. Abgerufen 2. November 2020 von <http://www.statmodel.com/discussion/messages/11/20834.html>.

Muthén, B. O. (2015b, 11.03). Bootstrap or MLR. Abgerufen 2. November 2020 von <http://www.statmodel.com/discussion/messages/11/20834.html>.
