# Supplementary material for: Die Rolle elterlicher Kommunikation in Konfliktsituationen für das Erziehungsverhalten und das psychische Wohlbefinden von Jugendlichen
Source: Atypon-hosted journal article supplement (doi:10.1026/0942-5403/a000378), 2022-09-05
Supplement: 0942-5403_a000378_esm2.pdf [file 0942-5403_a000378_esm2.pdf]

## ESM 2. Messmodelle latenter Variablen

### Ergebnisse

Graphische Veranschaulichungen der Messmodelle befinden sich in den Abbildungen A1 bis A4.

Die Messmodelle der latenten Konstrukte *konstruktive Kommunikation*, *positives und negatives Erziehungsverhalten* bestehen jeweils aus drei Indikatoren und sind daher gerade identifiziert. Bei gerade identifizierten Modellen entspricht die Anzahl der Datenpunkte der Anzahl der Parameter, weshalb solche Modelle eindeutig lösbar sind und die Modellgüte zwangsläufig perfekt ist (Arzheimer, 2016). Für das Messmodell der destruktiven väterlichen Kommunikation liegen die Modell Fit-Indizes im sehr guten Bereich (Väter: RMSEA = 0.03, CFI = 1.00, TLI = 1.00), während die Modellgüte für mütterliche destruktive Kommunikation deutlich schlechter zu bewerten ist (Mütter: RMSEA = 0.12, CFI = 0.98, TLI = 0.94).

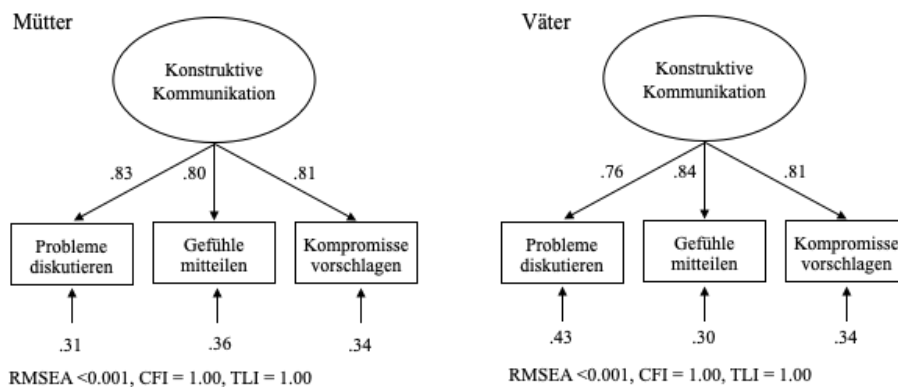

Abbildung A1.

Messmodelle (CFA) der elterlichen konstruktiven Kommunikation in Konfliktsituationen. Dargestellt sind standardisierte Faktorladungen und Varianzen.

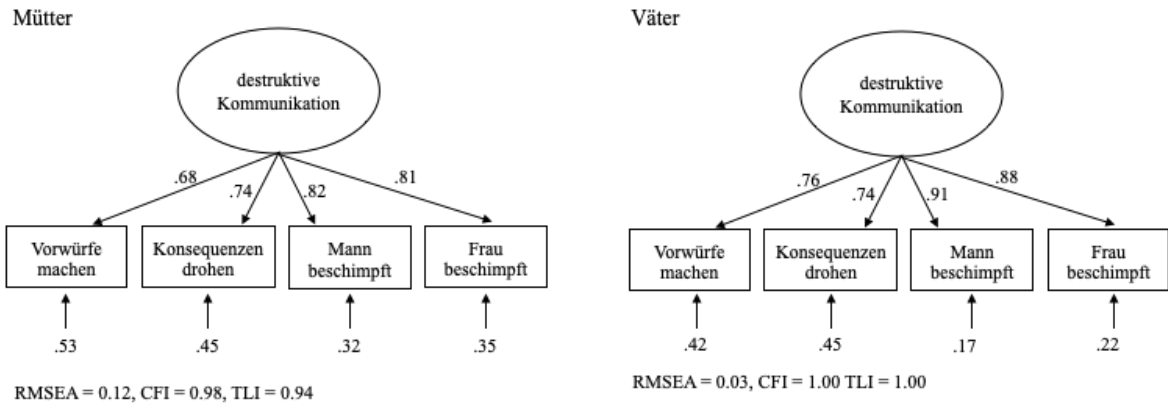

Abbildung A2.

Messmodelle (CFA) der elterlichen destruktiven Kommunikation in Konfliktsituationen. Dargestellt sind standardisierte Faktorladungen und Varianzen.

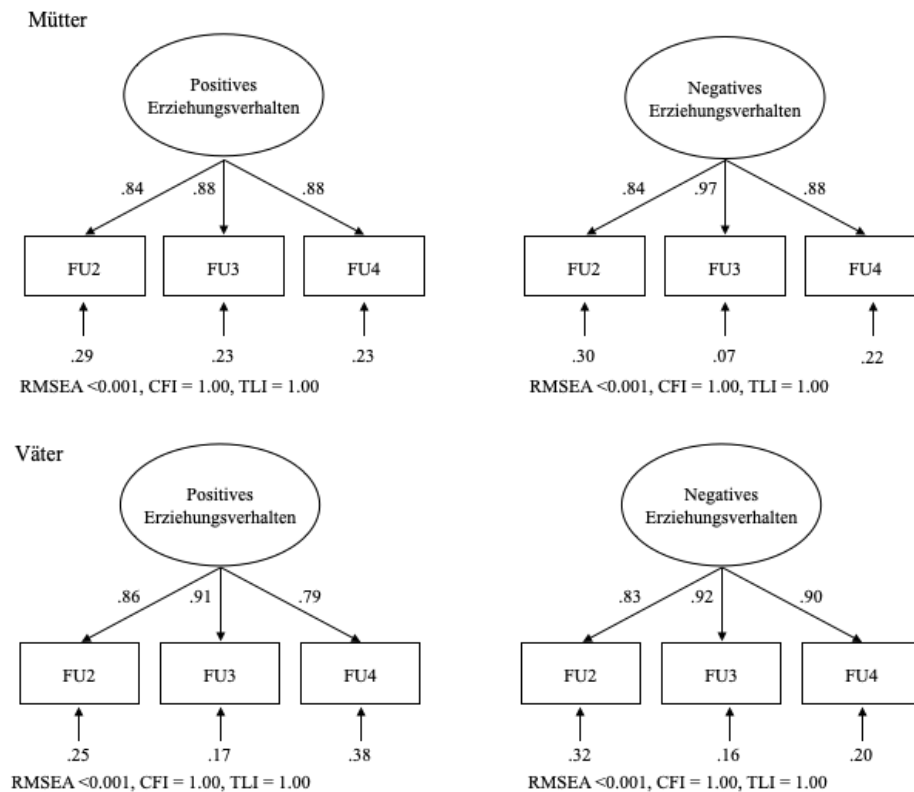

Abbildung A3.

Messmodelle (CFA) positiven und negativen Erziehungsverhaltens. Dargestellt sind standardisierte Faktorladungen und Varianzen.

Das Messmodell der jugendlichen psychischen Gesundheit beinhaltet die latenten Variablen *internalisierende*, *externalisierende Auffälligkeiten* und *prosoziales Verhalten*, die sich jeweils aus den Einschätzungen der Mütter, Väter und Kinder zusammensetzen. Die Konstruktion eines Modells, das alle drei Kriteriumsvariablen

sowie deren Interkorrelationen umfasst, ermöglicht die Testung eines überidentifizierten Modells. Einzelne Messmodelle für internalisierende, externalisierende Auffälligkeiten und prosoziales Verhalten wären gerade identifiziert, da jeweils aus drei Indikatoren bestehend, und daher, wie oben beschrieben, eindeutig lösbar. Somit liefert die Modellgüte des aufgestellten Modells der kindlichen psychischen Gesundheit aussagekräftigere Informationen. Da das Item der mütterlichen Einschätzung externalisierender Auffälligkeiten eine nicht signifikante negative Varianz aufwies, wurde diese negative Varianz durch die Varianz der mütterlichen Einschätzung internalisierender Auffälligkeiten ersetzt. Negative Varianzen treten häufiger in Modellen mit latenten Variablen auf und können unterschiedliche Ursachen haben (Aichholzer, 2017). Hier könnte v.a. relevant sein, dass die latenten Variablen, bis auf destruktive Kommunikation, nur aus drei Indikatoren bestehen und somit zu wenige Faktoren pro Faktor vorliegen. Andere mögliche Ursachen könnten ein kleiner Stichprobenumfang und Extremwerte sein. Das Messmodell der kindlichen psychischen Gesundheit weist einen guten Modellfit auf (RMSEA = 0.06, CFI = 0.98, TLI = 0.96).

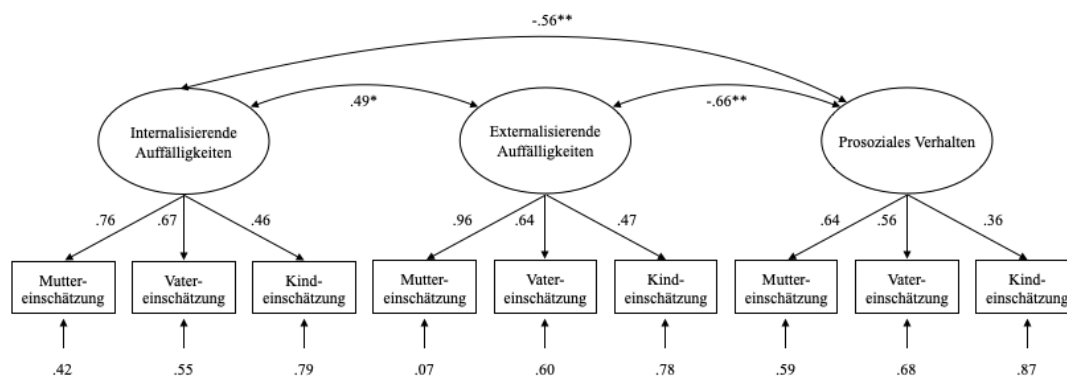

Abbildung A4.

Messmodell (CFA) der kindlichen psychischen Gesundheit. Dargestellt sind standardisierte Faktorladungen und Varianzen. Modell Fit-Indizes: RMSEA = 0.06, CFI = 0.98, TLI = 0.96. p Werte für Korrelationen der latenten Variablen dargestellt. \* $p < .05$ , \*\* $p < .01$ , \*\*\* $p < .001$ . Der Übersichtlichkeit halber sind Interkorrelationen der Einschätzungen in Tabelle A5 dargestellt.

*Tabelle A5.*

Interkorrelationen der Indikatoren für das Messmodell der kindlichen psychischen Gesundheit

---

|                                                           |       |
|-----------------------------------------------------------|-------|
| <i>Muttereinschätzungen</i>                               |       |
| Internalisierende – Externalisierende Auffälligkeiten     | .79   |
| Internalisierende Auffälligkeiten – prosoziales Verhalten | .04   |
| Externalisierende Auffälligkeiten – prosoziales Verhalten | .26   |
| <i>Vatereinschätzungen</i>                                |       |
| Internalisierende – Externalisierende Auffälligkeiten     | .71*  |
| Internalisierende Auffälligkeiten – prosoziales Verhalten | -.15  |
| Externalisierende Auffälligkeiten – prosoziales Verhalten | -.37* |
| <i>Kindeinschätzungen</i>                                 |       |
| Internalisierende – Externalisierende Auffälligkeiten     | .46*  |
| Internalisierende Auffälligkeiten – prosoziales Verhalten | .03   |
| Externalisierende Auffälligkeiten – prosoziales Verhalten | -.03  |

---

*Anmerkungen.* \* $p < .05$ . \*\* $p < .01$ . \*\*\* $p < .001$ .

## Literatur

- Aichholzer, J. (2017). Einführung in lineare Strukturgleichungsmodelle mit Stata. Springer Fachmedien Wiesbaden.
- Arzheimer, K. (2015). Strukturgleichungsmodelle: eine anwendungsorientierte Einführung. Springer-Verlag.
