# Supplementary material for: Die Rolle elterlicher Kommunikation in Konfliktsituationen für das Erziehungsverhalten und das psychische Wohlbefinden von Jugendlichen
Source: Atypon-hosted journal article supplement (doi:10.1026/0942-5403/a000378), 2022-09-05
Supplement: 0942-5403_a000378_esm3.pdf [file 0942-5403_a000378_esm3.pdf]

### ESM 3. Abbildungen E1 bis E4

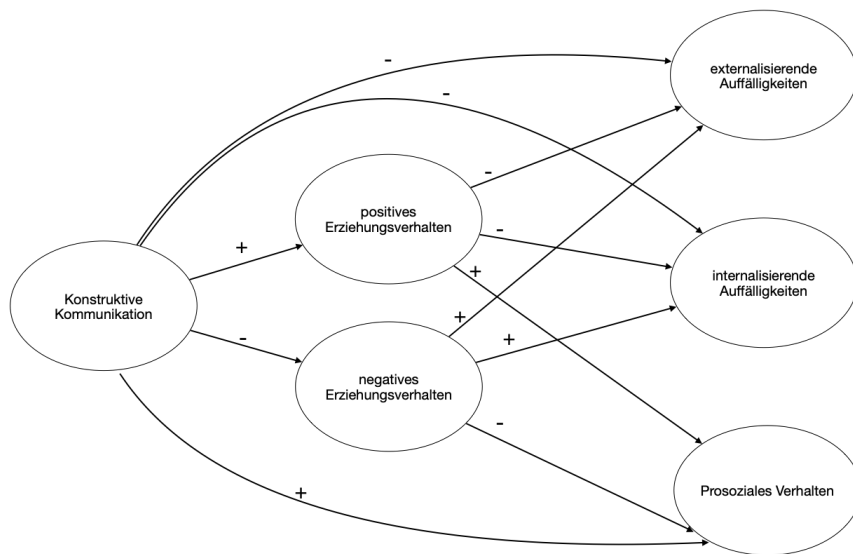

**Abbildung E1.**  
Grafische Darstellung der angenommenen Zusammenhänge für elterliche konstruktive Kommunikation in Konfliktsituationen.

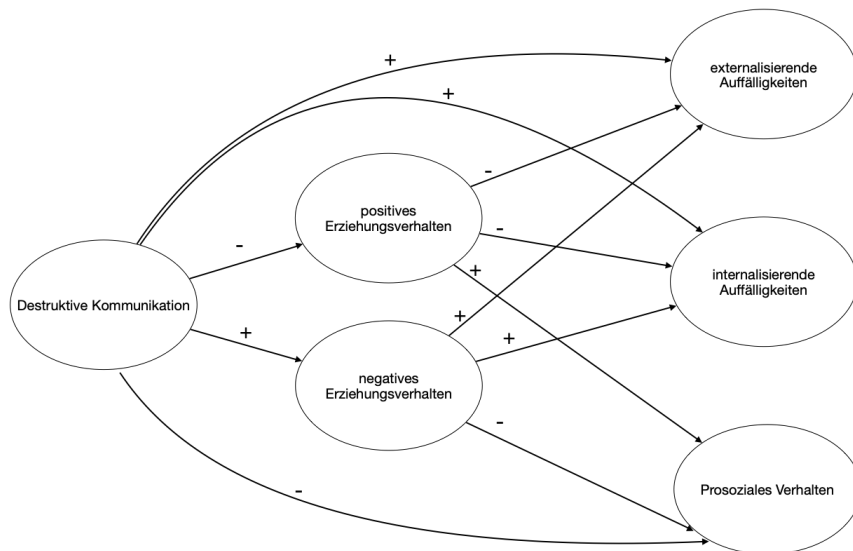

**Abbildung E2.**  
Grafische Darstellung der angenommenen Zusammenhänge für elterliche destruktive Kommunikation in Konfliktsituationen.

Mütter

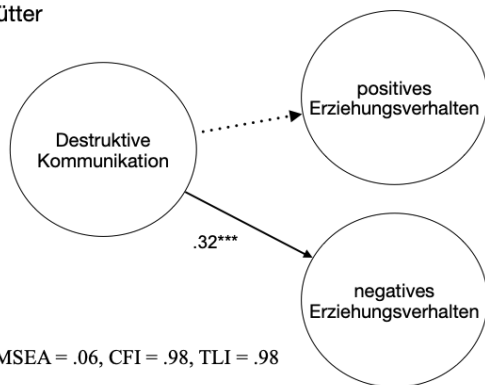

Väter

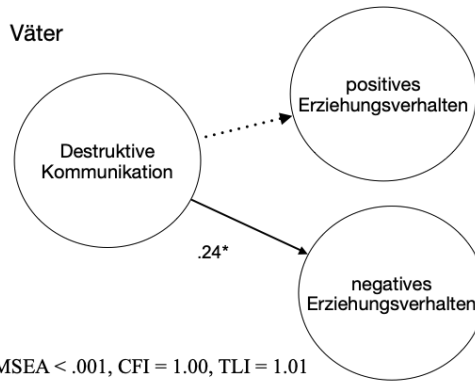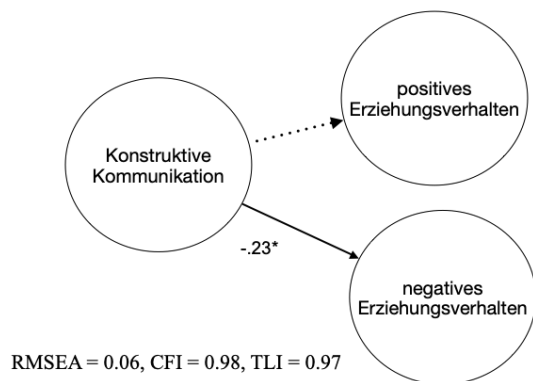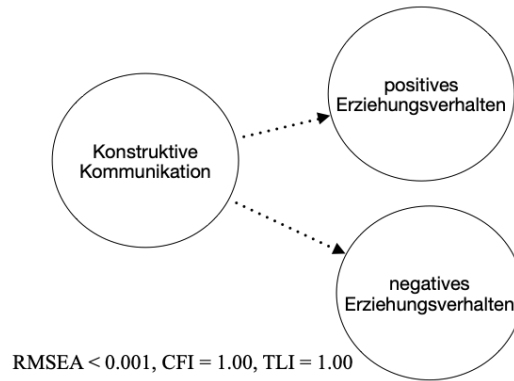

**Abbildung E3.**

Graphische Darstellung der Ergebnisse zur Vorhersage des Erziehungsverhaltens durch elterliche Kommunikation in Konfliktsituationen. Gestrichelte Linien entsprechen nichtsignifikanten Pfaden, durchgezogene Linien entsprechen signifikanten Pfaden. Angabe standardisierter Regressionskoeffizienten ( $\beta$ ), \* $p < .05$ , \*\* $p < .01$ , \*\*\* $p < .001$ .

## Mütter

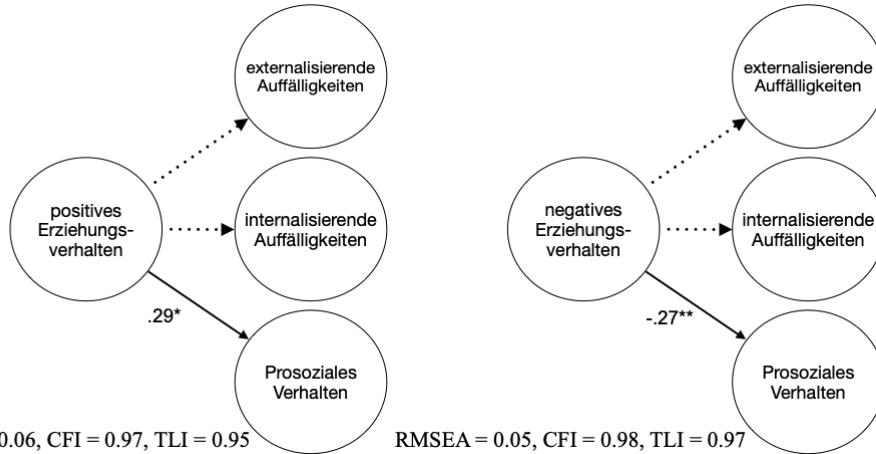

## Väter

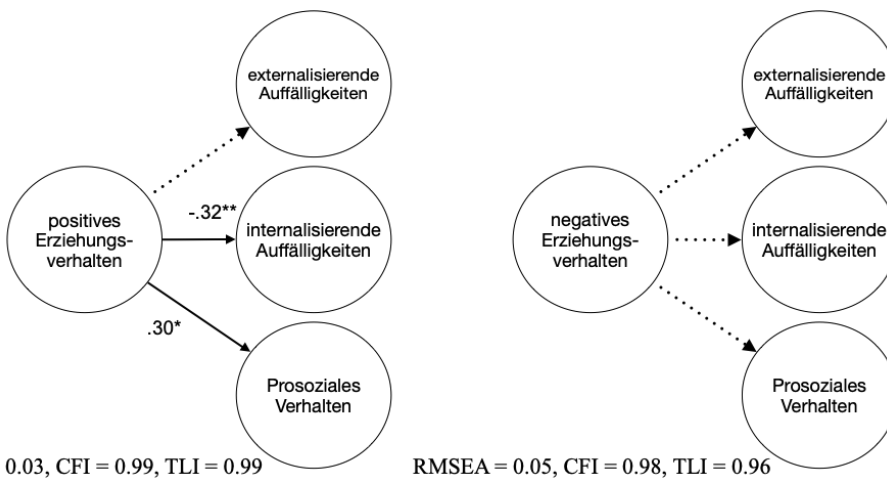

### Abbildung E4.

Graphische Darstellung der Ergebnisse zur Vorhersage kindlicher psychischer Gesundheit durch das Erziehungsverhalten. Gestrichelte Linien entsprechen nichtsignifikanten Pfaden, durchgezogene Linien entsprechen signifikanten Pfaden. Angabe standardisierter Regressionskoeffizienten ( $\beta$ ), \* $p < .05$ , \*\* $p < .01$ , \*\*\* $p < .001$ .
