# Supplementary material for: Die Rolle elterlicher Kommunikation in Konfliktsituationen für das Erziehungsverhalten und das psychische Wohlbefinden von Jugendlichen
Source: Atypon-hosted journal article supplement (doi:10.1026/0942-5403/a000378), 2022-09-05
Supplement: 0942-5403_a000378_esm4.pdf [file 0942-5403_a000378_esm4.pdf]

## ESM 4. Tabellen E1 bis E4

*Tabelle E1.*

Ergebnisse des Mediatormodells für mütterliche konstruktive Kommunikation

|                                                                                     | B     | [95%KI]         | SE (B) | $\beta$ | p          |
|-------------------------------------------------------------------------------------|-------|-----------------|--------|---------|------------|
| Totaler Effekt konstruktiver Kommunikation auf                                      |       |                 |        |         |            |
| Internalisierende Auffälligkeiten                                                   | -0.67 | [-1.34, -0.001] | 0.31   | -.21    | <b>.04</b> |
| Externalisierende Auffälligkeiten                                                   | -0.77 | [-1.73, 0.05]   | 0.45   | -.18    | .09        |
| Prosoziales Verhalten                                                               | 0.21  | [0.01, 0.45]    | 0.11   | .27     | .06        |
| Direkter Effekt konstruktiver Kommunikation auf                                     |       |                 |        |         |            |
| Positives Erziehungsverhalten                                                       | 0.04  | [0.00, 0.09]    | 0.02   | .18     | .08        |
| Negatives Erziehungsverhalten                                                       | -0.11 | [-0.20, -0.03]  | 0.04   | -.25    | <b>.02</b> |
| Internalisierende Auffälligkeiten                                                   | -0.50 | [-1.28, 0.21]   | 0.38   | -.16    | .17        |
| Externalisierende Auffälligkeiten                                                   | -0.63 | [-1.77, 0.25]   | 0.51   | -.15    | .22        |
| Prosoziales Verhalten                                                               | 0.15  | [-0.06, 0.41]   | 0.12   | .17     | .20        |
| Effekte ... Erziehungsverhaltens auf                                                |       |                 |        |         |            |
| positiven                                                                           |       |                 |        |         |            |
| Internalisierende Auffälligkeiten                                                   | -2.09 | [-5.29, 1.43]   | 1.71   | -.15    | .15        |
| Externalisierende Auffälligkeiten                                                   | 0.28  | [-3.41, 5.14]   | 2.17   | .02     | .90        |
| Prosoziales Verhalten                                                               | 0.64  | [-0.29, 1.7]    | 0.51   | .19     | .21        |
| Internalisierende Auffälligkeiten                                                   | 0.66  | [-1.53, 2.28]   | 0.97   | .09     | .50        |
| Externalisierende Auffälligkeiten                                                   | 1.51  | [-0.59, 3.24]   | 0.97   | .15     | .12        |
| Prosoziales Verhalten                                                               | -0.30 | [-0.69, 0.11]   | 0.20   | -.17    | .13        |
| Indirekte Effekte konstruktiver Kommunikation auf internalisierende Auffälligkeiten |       |                 |        |         |            |
| über                                                                                |       |                 |        |         |            |
| positives Erziehungsverhalten                                                       | -0.08 | [-0.30, 0.07]   | 0.12   | -.03    | .19        |
| negatives Erziehungsverhalten                                                       | -0.07 | [-0.31, 0.18]   | 0.12   | -.02    | .55        |
| Indirekte Effekte konstruktiver Kommunikation auf externalisierende Auffälligkeiten |       |                 |        |         |            |
| über                                                                                |       |                 |        |         |            |
| positives Erziehungsverhalten                                                       | 0.01  | [-0.14, 0.31]   | 0.38   | .00     | .19        |
| negatives Erziehungsverhalten                                                       | 0.03  | [-0.01, 0.09]   | 0.13   | -.04    | .21        |
| Indirekte Effekte konstruktiver Kommunikation auf prosoziales Verhalten             |       |                 |        |         |            |
| über                                                                                |       |                 |        |         |            |
| positives Erziehungsverhalten                                                       | 0.03  | [-0.02, 0.08]   | 0.03   | .03     | .31        |
| negatives Erziehungsverhalten                                                       | 0.01  | [-0.05, 0.07]   | 0.03   | .04     | .22        |
| Totaler indirekter Effekt konstruktiver Kommunikation auf                           |       |                 |        |         |            |
| Internalisierende Auffälligkeiten                                                   | -0.15 | [-0.45, 0.13]   | 0.15   | -.05    | .29        |
| Externalisierende Auffälligkeiten                                                   | -0.15 | [-0.43, 0.23]   | 0.16   | -.04    | .36        |
| Prosoziales Verhalten                                                               | 0.06  | [0.00, 0.14]    | 0.04   | .08     | .11        |

*Anmerkungen.* SE = Standardfehler. Direkter Effekt  $\hat{=}$  dem Effekt konstruktiver Kommunikation auf kindliche psychische Gesundheit, wenn das Erziehungsverhalten im Modell inbegriffen ist. Totaler Effekt  $\hat{=}$  dem Effekt konstruktiver Kommunikation auf kindliche psychische Gesundheit ohne Erziehungsverhalten im Modell. Fettdruck:  $p < .05$ .

Tabelle E2.

Ergebnisse des Mediatormodells für väterliche konstruktive Kommunikation

|                                                                                     | B     | [95%KI]        | SE (B) | $\beta$ | p           |
|-------------------------------------------------------------------------------------|-------|----------------|--------|---------|-------------|
| Totaler Effekt konstruktiver Kommunikation auf                                      |       |                |        |         |             |
| Internalisierende Auffälligkeiten                                                   | -0.62 | [-1.39, 0.22]  | 0.41   | -.18    | .13         |
| Externalisierende Auffälligkeiten                                                   | -0.82 | [-1.61, 0.22]  | 0.47   | -.16    | .08         |
| Prosoziales Verhalten                                                               | 0.14  | [-0.08, 0.36]  | 0.11   | .16     | .21         |
| Direkter Effekt konstruktiver Kommunikation auf                                     |       |                |        |         |             |
| Positives Erziehungsverhalten                                                       | 0.04  | [-0.01, 0.10]  | 0.03   | .16     | .14         |
| Negatives Erziehungsverhalten                                                       | -0.08 | [-0.17, 0.00]  | 0.04   | -.21    | .05         |
| Internalisierende Auffälligkeiten                                                   | -0.45 | [-1.24, 0.38]  | 0.41   | -.13    | .28         |
| Externalisierende Auffälligkeiten                                                   | -0.65 | [-1.54, 0.51]  | 0.53   | -.13    | .22         |
| Prosoziales Verhalten                                                               | 0.09  | [-.14, 0.35]   | 0.12   | .10     | .46         |
| Effekte ... Erziehungsverhaltens auf                                                |       |                |        |         |             |
| positiven                                                                           |       |                |        |         |             |
| Internalisierende Auffälligkeiten                                                   | -3.64 | [-6.74, -0.86] | 1.50   | -.29    | <b>.02</b>  |
| Externalisierende Auffälligkeiten                                                   | -1.65 | [-4.98, 1.68]  | 1.68   | -.02    | .33         |
| Prosoziales Verhalten                                                               | 0.86  | [0.02, 1.7]    | 0.43   | .27     | <b>.048</b> |
| negativen                                                                           |       |                |        |         |             |
| Internalisierende Auffälligkeiten                                                   | 0.16  | [-2.13, 1.98]  | 1.05   | .10     | .89         |
| Externalisierende Auffälligkeiten                                                   | 1.19  | [-1.07, 3.06]  | 1.06   | .12     | .26         |
| Prosoziales Verhalten                                                               | -0.17 | [-0.58, 0.59]  | 0.29   | -.21    | .56         |
| Indirekte Effekte konstruktiver Kommunikation auf internalisierende Auffälligkeiten |       |                |        |         |             |
| über                                                                                |       |                |        |         |             |
| positives Erziehungsverhalten                                                       | -0.16 | [-0.42, 0.05]  | 0.12   | -.05    | .19         |
| negatives Erziehungsverhalten                                                       | -0.01 | [-0.22, 0.19]  | 0.10   | -.004   | .89         |
| Indirekte Effekte konstruktiver Kommunikation auf externalisierende Auffälligkeiten |       |                |        |         |             |
| über                                                                                |       |                |        |         |             |
| positives Erziehungsverhalten                                                       | -0.07 | [-0.33, 0.08]  | 0.10   | -.01    | .49         |
| negatives Erziehungsverhalten                                                       | -0.10 | [-0.35, 0.10]  | 0.11   | -.02    | .37         |
| Indirekte Effekte konstruktiver Kommunikation auf prosoziales Verhalten             |       |                |        |         |             |
| über                                                                                |       |                |        |         |             |
| positives Erziehungsverhalten                                                       | 0.04  | [-0.01, 0.12]  | 0.03   | .04     | .27         |
| negatives Erziehungsverhalten                                                       | 0.01  | [-0.05, 0.07]  | 0.03   | .02     | .60         |
| Totaler indirekter Effekt konstruktiver Kommunikation auf                           |       |                |        |         |             |
| Internalisierende Auffälligkeiten                                                   | -0.17 | [-0.49, 0.13]  | 0.16   | -.05    | .27         |
| Externalisierende Auffälligkeiten                                                   | -0.17 | [-0.54, 0.08]  | 0.15   | -.03    | .27         |
| Prosoziales Verhalten                                                               | 0.05  | [-0.03, 0.14]  | 0.04   | .06     | .22         |

*Anmerkungen.* SE = Standardfehler. Direkter Effekt = dem Effekt konstruktiver Kommunikation auf kindliche psychische Gesundheit, wenn das Erziehungsverhalten im Modell inbegriffen ist. Totaler Effekt = dem Effekt konstruktiver Kommunikation auf kindliche psychische Gesundheit ohne Erziehungsverhalten im Modell. Fettdruck:  $p < .05$ .

Tabelle E3

Ergebnisse des Mediatormodells für mütterliche destruktive Kommunikation

|                                                                                    | B            | [95%KI]              | SE (B)      | $\beta$     | p               |
|------------------------------------------------------------------------------------|--------------|----------------------|-------------|-------------|-----------------|
| Totaler Effekt destruktiver Kommunikation auf                                      |              |                      |             |             |                 |
| Internalisierende Auffälligkeiten                                                  | 0.36         | [-0.26, 0.99]        | 0.32        | .10         | .26             |
| Externalisierende Auffälligkeiten                                                  | 0.97         | [0.16, 1.78]         | 0.41        | .21         | <b>.02</b>      |
| Prosoziales Verhalten                                                              | -0.07        | [-0.27, 0.15]        | 0.11        | -.09        | .49             |
| Direkter Effekt destruktiver Kommunikation auf                                     |              |                      |             |             |                 |
| Positives Erziehungsverhalten                                                      | -0.01        | [-0.06, 0.03]        | 0.02        | -.04        | .63             |
| Negatives Erziehungsverhalten                                                      | 0.15         | [0.07, 0.23]         | 0.04        | .33         | <b>&lt;.001</b> |
| Internalisierende Auffälligkeiten                                                  | 0.22         | [-0.37, 0.88]        | 0.32        | .06         | .50             |
| Externalisierende Auffälligkeiten                                                  | 0.78         | [-0.07, 1.68]        | 0.45        | .17         | .08             |
| Prosoziales Verhalten                                                              | -0.01        | [-0.21, 0.23]        | 0.11        | -.01        | .93             |
| Effekte ... Erziehungsverhaltens auf                                               |              |                      |             |             |                 |
| positiven                                                                          |              |                      |             |             |                 |
| Internalisierende Auffälligkeiten                                                  | -2.44        | [-5.68, 1.04]        | 1.71        | -.18        | .15             |
| Externalisierende Auffälligkeiten                                                  | -0.28        | [-3.82, 4.04]        | 2.00        | -.02        | .89             |
| Prosoziales Verhalten                                                              | 0.70         | [-0.17, 1.69]        | 0.48        | .21         | .14             |
| negativen                                                                          |              |                      |             |             |                 |
| Internalisierende Auffälligkeiten                                                  | 0.74         | [-1.42, 2.42]        | 0.98        | .10         | .45             |
| Externalisierende Auffälligkeiten                                                  | 1.23         | [-0.75, 3.06]        | 0.97        | .12         | .21             |
| Prosoziales Verhalten                                                              | -0.38        | [-0.81, 0.04]        | 0.22        | -.21        | .08             |
| Indirekte Effekte destruktiver Kommunikation auf internalisierende Auffälligkeiten |              |                      |             |             |                 |
| über                                                                               |              |                      |             |             |                 |
| positives Erziehungsverhalten                                                      | 0.03         | [-0.09, 0.17]        | 0.06        | .01         | .69             |
| negatives Erziehungsverhalten                                                      | 0.11         | [-0.23, 0.42]        | 0.16        | .03         | .48             |
| Indirekte Effekte destruktiver Kommunikation auf externalisierende Auffälligkeiten |              |                      |             |             |                 |
| über                                                                               |              |                      |             |             |                 |
| positives Erziehungsverhalten                                                      | 0.00         | [-0.12, 0.10]        | 0.05        | .00         | .95             |
| negatives Erziehungsverhalten                                                      | 0.18         | [-0.11, 0.54]        | 0.16        | .04         | .26             |
| Indirekte Effekte destruktiver Kommunikation auf prosoziales Verhalten             |              |                      |             |             |                 |
| über                                                                               |              |                      |             |             |                 |
| positives Erziehungsverhalten                                                      | -0.01        | [-0.05, 0.03]        | 0.02        | -.01        | .68             |
| negatives Erziehungsverhalten                                                      | -0.06        | [-0.15, 0.01]        | 0.04        | -.07        | .15             |
| Totaler indirekter Effekt destruktiver Kommunikation auf                           |              |                      |             |             |                 |
| Internalisierende Auffälligkeiten                                                  | 0.14         | [-0.22, 0.47]        | 0.17        | .04         | .43             |
| Externalisierende Auffälligkeiten                                                  | 0.19         | [-0.12, 0.53]        | 0.17        | .04         | .26             |
| <i>Prosoziales Verhalten</i>                                                       | <i>-0.07</i> | <i>[-0.17, 0.01]</i> | <i>0.05</i> | <i>-.08</i> | <i>.16</i>      |

*Anmerkungen.* SE = Standardfehler. Direkter Effekt  $\hat{=}$  dem Effekt destruktiver Kommunikation auf kindliche psychische Gesundheit, wenn das Erziehungsverhalten im Modell inbegriffen ist. Totaler Effekt  $\hat{=}$  dem Effekt destruktiver Kommunikation auf kindliche psychische Gesundheit ohne Erziehungsverhalten im Modell. Fettdruck:  $p < .05$ .

Tabelle E4

Ergebnisse des Mediatormodells für väterliche destruktive Kommunikation

|                                                                                    | B     | [95%KI]        | SE (B) | $\beta$ | p          |
|------------------------------------------------------------------------------------|-------|----------------|--------|---------|------------|
| Totaler Effekt destruktiver Kommunikation auf                                      |       |                |        |         |            |
| Internalisierende Auffälligkeiten                                                  | 0.23  | [-0.35, 0.79]  | 0.29   | .08     | .43        |
| Externalisierende Auffälligkeiten                                                  | 0.47  | [-0.16, 1.06]  | 0.31   | .11     | .13        |
| Prosoziales Verhalten                                                              | 0.00  | [-0.17, 0.22]  | 0.10   | .01     | .97        |
| Direkter Effekt destruktiver Kommunikation auf                                     |       |                |        |         |            |
| Positives Erziehungsverhalten                                                      | -0.03 | [-0.08, 0.02]  | 0.03   | -.12    | .26        |
| Negatives Erziehungsverhalten                                                      | 0.08  | [0.02, 0.15]   | 0.03   | .25     | <b>.01</b> |
| Internalisierende Auffälligkeiten                                                  | 0.10  | [-0.48, 0.69]  | 0.30   | .04     | .74        |
| Externalisierende Auffälligkeiten                                                  | 0.32  | [-0.40, 0.97]  | 0.35   | .08     | .36        |
| Prosoziales Verhalten                                                              | 0.05  | [-0.14, 0.27]  | 0.11   | .07     | .64        |
| Effekte ... Erziehungsverhaltens auf                                               |       |                |        |         |            |
| positiven                                                                          |       |                |        |         |            |
| Internalisierende Auffälligkeiten                                                  | -3.80 | [-6.94, -1.11] | 1.48   | -.31    | <b>.01</b> |
| Externalisierende Auffälligkeiten                                                  | -1.80 | [-4.99, 1.36]  | 1.63   | -.10    | .27        |
| Prosoziales Verhalten                                                              | 0.93  | [0.04, 1.78]   | 0.45   | .29     | <b>.04</b> |
| negativen                                                                          |       |                |        |         |            |
| Internalisierende Auffälligkeiten                                                  | 0.27  | [-2.03, 2.09]  | 1.04   | .03     | .79        |
| Externalisierende Auffälligkeiten                                                  | 1.26  | [-0.93, 3.10]  | 1.03   | .10     | .22        |
| Prosoziales Verhalten                                                              | -0.24 | [-0.64, 0.42]  | 0.26   | -.11    | .35        |
| Indirekte Effekte destruktiver Kommunikation auf internalisierende Auffälligkeiten |       |                |        |         |            |
| über                                                                               |       |                |        |         |            |
| positives Erziehungsverhalten                                                      | 0.11  | [-0.09, 0.32]  | 0.10   | .04     | .30        |
| negatives Erziehungsverhalten                                                      | 0.02  | [-0.16, 0.21]  | 0.09   | .01     | .81        |
| Indirekte Effekte destruktiver Kommunikation auf externalisierende Auffälligkeiten |       |                |        |         |            |
| über                                                                               |       |                |        |         |            |
| positives Erziehungsverhalten                                                      | 0.05  | [-0.06, 0.24]  | 0.08   | .01     | .50        |
| negatives Erziehungsverhalten                                                      | 0.10  | [-0.07, 0.35]  | 0.11   | .03     | .33        |
| Indirekte Effekte destruktiver Kommunikation auf prosoziales Verhalten             |       |                |        |         |            |
| über                                                                               |       |                |        |         |            |
| positives Erziehungsverhalten                                                      | -0.03 | [-0.09, 0.02]  | 0.03   | -.04    | .35        |
| negatives Erziehungsverhalten                                                      | -0.02 | [-0.07, 0.03]  | 0.02   | -.03    | .41        |
| Totaler indirekter Effekt destruktiver Kommunikation auf                           |       |                |        |         |            |
| Internalisierende Auffälligkeiten                                                  | 0.13  | [-0.17, 0.42]  | 0.15   | .05     | .38        |
| Externalisierende Auffälligkeiten                                                  | 0.15  | [-0.06, 0.46]  | 0.13   | .04     | .24        |
| Prosoziales Verhalten                                                              | -0.05 | [-0.12, 0.03]  | 0.04   | -.06    | .22        |

*Anmerkungen.* SE = Standardfehler. Direkter Effekt  $\hat{=}$  dem Effekt destruktiver Kommunikation auf kindliche psychische Gesundheit, wenn das Erziehungsverhalten im Modell inbegriffen ist. Totaler Effekt  $\hat{=}$  dem Effekt destruktiver Kommunikation auf kindliche psychische Gesundheit ohne Erziehungsverhalten im Modell. Fettdruck:  $p < .05$
